# Supplementary material for: Theoretical study of two-dimensional bis(iminothiolato)metal monolayers as promising electrocatalysts for carbon dioxide reduction
Source: Royal Society of Chemistry journal article supplement (doi:10.1039/d0nj02513e), 2020-01-01
Supplement: d0nj02513e1.pdf [file d0nj02513e1.pdf]

Electronic Supplementary Information for New Journal of Chemistry

## Supporting Information

**Theoretical study of two-dimensional bis(iminothiolato)metal monolayers as promising electrocatalysts for carbon dioxide reduction**

Guanru Xing,<sup>1,2</sup> Lin Cheng,<sup>1,\*</sup> Kai Li,<sup>2</sup> Yan Gao,<sup>3</sup> Hao Tang,<sup>3,\*</sup> Ying Wang,<sup>2</sup> Zhijian Wu<sup>2,\*</sup>

<sup>1</sup> *College of Chemical Engineering, Inner Mongolia University of Technology, Inner Mongolia Key Laboratory of Theoretical and Computational Chemistry Simulation, Hohhot 010051, P. R. China.*

<sup>2</sup> *State Key Laboratory of Rare Earth Resource Utilization, Changchun Institute of Applied Chemistry, Chinese Academy of Sciences, Changchun 130022, P. R. China.*

<sup>3</sup> *School of Automation Engineering, University of Electronic Science and Technology of China, Chengdu 611731, P. R. China.*

\*Corresponding authors. [lcheng1983@aliyun.com](mailto:lcheng1983@aliyun.com); [tanghao@uestc.edu.cn](mailto:tanghao@uestc.edu.cn) ;  
[zjwu@ciac.ac.cn](mailto:zjwu@ciac.ac.cn).

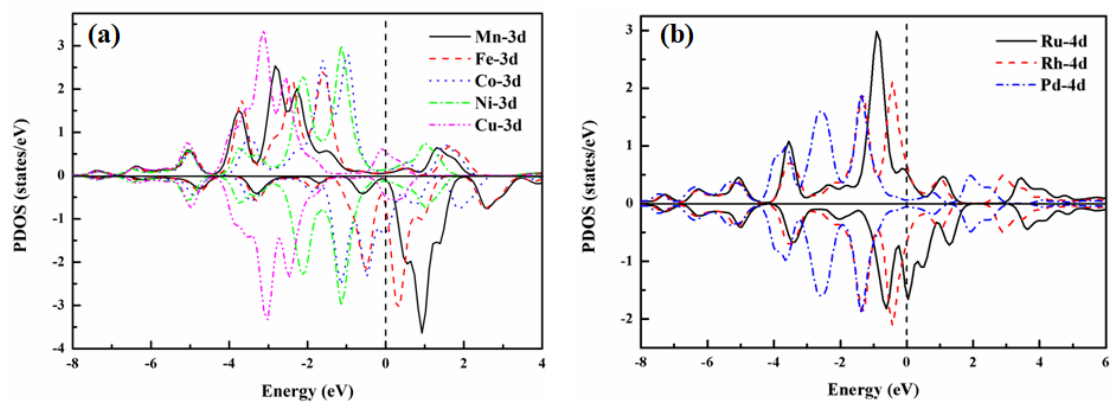

**Fig. S1** Density of states for 3d and 4d orbitals of the studied compounds.

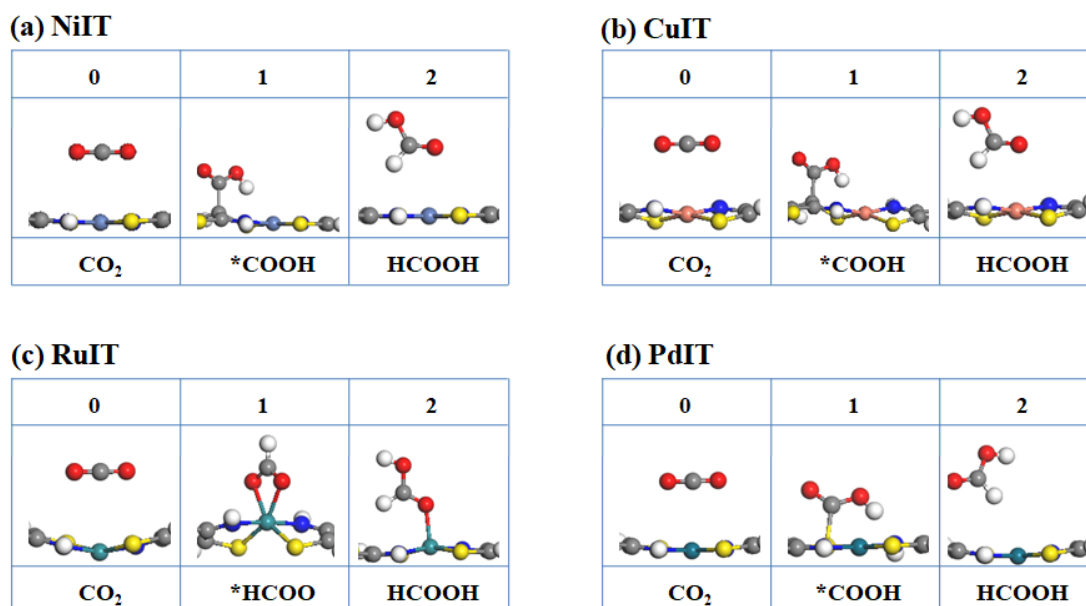

**Fig. S2** The most stable structures for the favorable pathway. (a), (b), and (d) are the formation of HCOOH via \*COOH on NiIT, CuIT, and PdIT, respectively. (c) is the formation of HCOOH via \*HCOO on RuIT. The numbers on top of each column are the transferred numbers of ( $H^+ + e^-$ ) pairs.

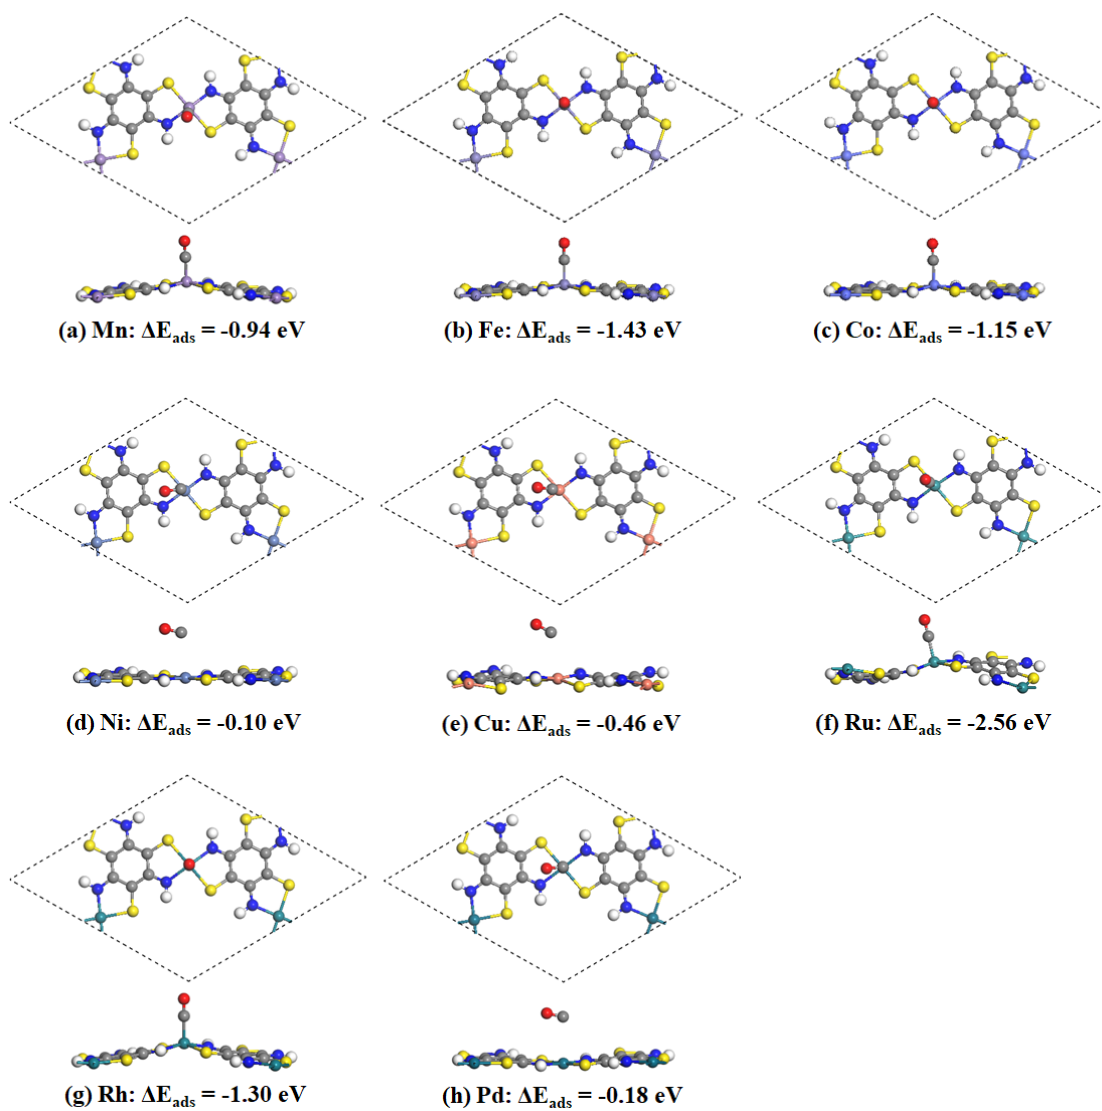

**Fig. S3** The most stable adsorption configurations of CO on TMIT.  $\Delta E_{\text{ads}}$  is the adsorption energy (eV).

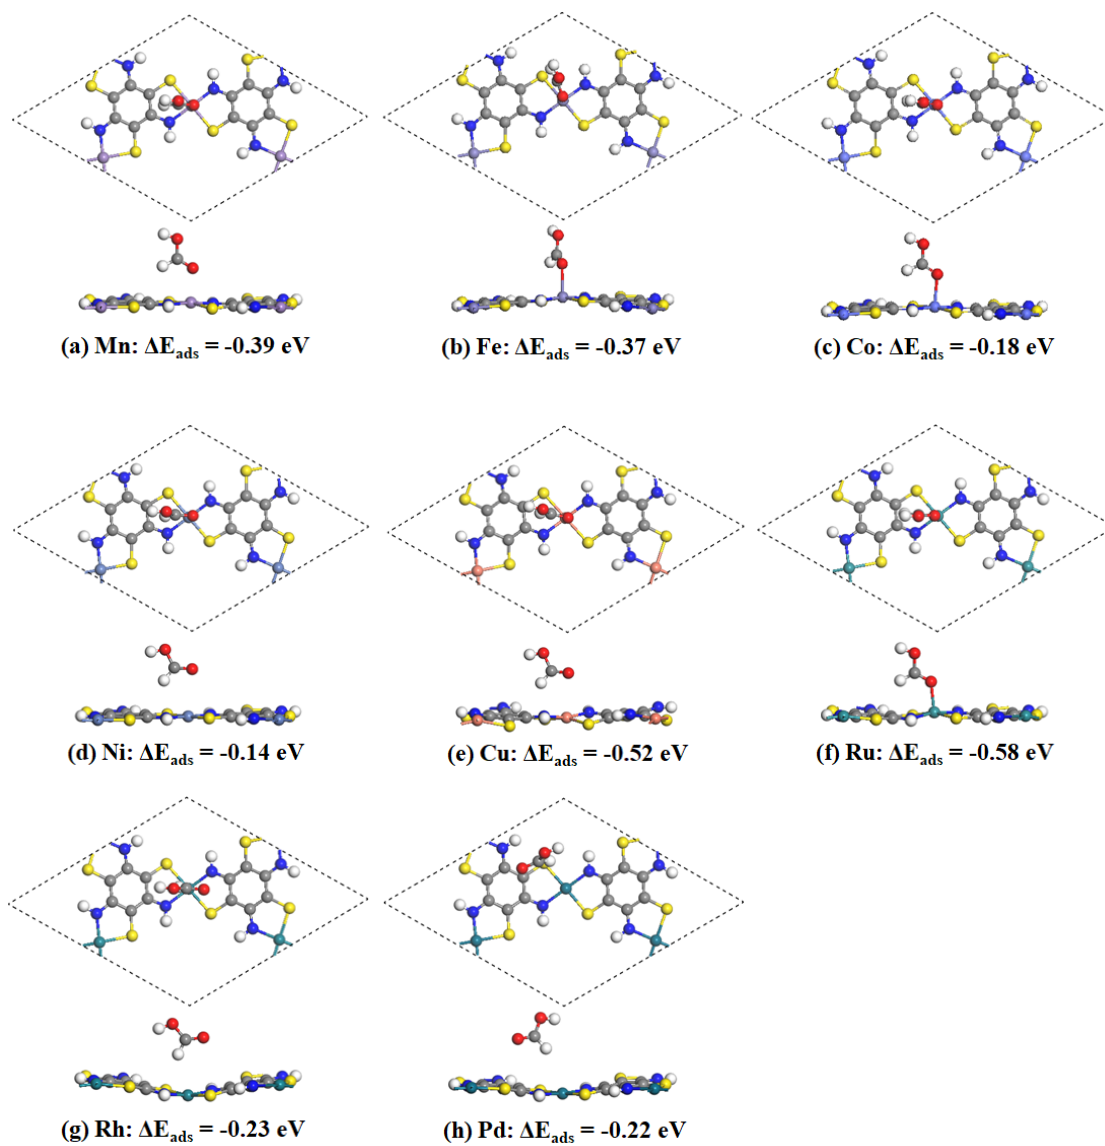

**Fig. S4** The most stable adsorption configurations of HCOOH on TMIT.  $\Delta E_{\text{ads}}$  is the adsorption energy (eV).
